# Supplementary material for: Drug Repurposing Approach against Novel Coronavirus Disease (COVID-19) through Virtual Screening Targeting SARS-CoV-2 Main Protease
Source: PubMed Central journal article supplement (PMC7822464; doi:10.3390/biology10010002), 2020-12-23
Supplement: biology-10-00002-s001.pdf [file biology-10-00002-s001.pdf]

Supplementary Materials

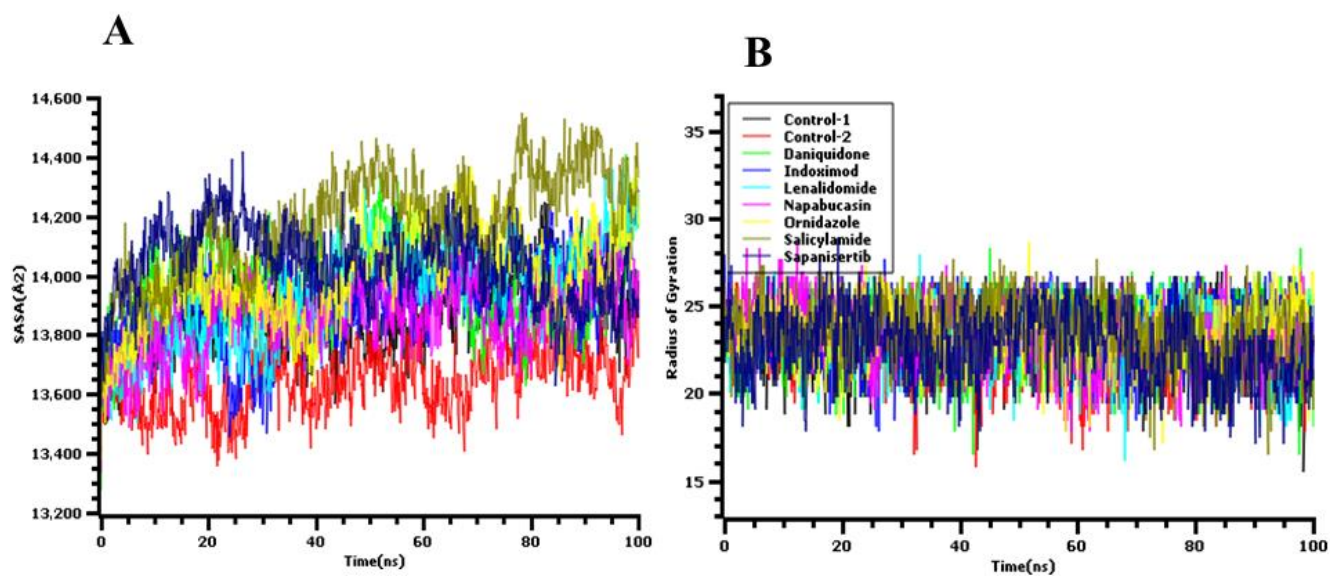

**Figure S1.** The molecular dynamics simulation study of the docked complex, (A) solvent accessible Surface area (SASA) and (B) radius of gyration (Rg) were assessed from the simulation trajectories.
